# Supplementary material for: Delineating Genetic Alterations for Tumor Progression in the MCF10A Series of Breast Cancer Cell Lines
Source: PLoS One. 2010 Feb 15;5(2):e9201. doi: 10.1371/journal.pone.0009201 (PMC2821407; doi:10.1371/journal.pone.0009201)
Supplement: Table S1 — This table summarizes global DNA copy number changes at chromosomal and sub-chromosomal levels for each of the four cell lines. (0.03 MB XLS) [file pone.0009201.s004.xls]

## Sheet: Sheet1
Table S1. DNA copy number (CN) gain and loss in the MCF10A series cell lines.
chr	cytoband	CN	cell lines
			MCF10A	MCF10AT	MCF10CA1h	MCF10CA1a
1	1q	gain			yes
2	2p	gain			yes
3	3p14-qter	gain			yes	yes
5	5q23-qter	gain	yes	yes	yes	yes
9	whole chromosome	gain		yes	yes	yes
10	10q22	gain	yes	yes	yes	yes
13	13q21	loss		yes
13	13q32	gain	yes	yes	yes	yes
14	14q12-q24	gain			yes
15	15q11-q25	gain			yes
17	17p11	gain	yes	yes	yes	yes
17	17q21-qter	gain			yes
19	19q13-qter	gain	yes	yes	yes
20	whole chromosome	gain	yes
20	20q11	loss			yes
20	21q11	loss	yes	yes	yes	yes
