# Supplementary material for: Delineating Genetic Alterations for Tumor Progression in the MCF10A Series of Breast Cancer Cell Lines
Source: PLoS One. 2010 Feb 15;5(2):e9201. doi: 10.1371/journal.pone.0009201 (PMC2821407; doi:10.1371/journal.pone.0009201)
Supplement: Table S4 — Genes display 4-fold difference in expression levels between MCF10A andMCF10AT. The values are log2(MCF10AT/MCF10A). The genes included here have log2ratio >2 or log2ratio <−2. (0.04 MB XLS) [file pone.0009201.s007.xls]

## Sheet: Table_S1
Table S4. Genes display 4-fold difference in expression levels between MCF10A andMCF10AT.
gene	geneId	description	log2ratio
MGP	4256	matrix Gla protein	5.51045
CDH19	28513	cadherin 19, type 2	5.08366
DUSP6	1848	dual specificity phosphatase 6	4.7404
ART3	419	ADP-ribosyltransferase 3	4.40172
TLR4	7099	toll-like receptor 4	4.37828
VCAN	1462	versican	4.1614
MAG1	84803	1-acylglycerol-3-phosphate O-acyltransferase 9	4.01479
PHLDA1	22822	pleckstrin homology-like domain, family A, member 1	3.96041
SEMA3D	223117	sema domain, immunoglobulin domain (Ig), short basic domain, secreted, (semaphorin) 3D	3.87007
ENC1	8507	ectodermal-neural cortex (with BTB-like domain)	3.72444
SERTAD4	56256	SERTA domain containing 4	3.55926
TCN1	6947	transcobalamin I (vitamin B12 binding protein, R binder family)	3.49095
CMTM7	112616	CKLF-like MARVEL transmembrane domain containing 7	3.44727
MYEOV	26579	myeloma overexpressed (in a subset of t(11;14) positive multiple myelomas)	3.29985
SEMA3A	10371	sema domain, immunoglobulin domain (Ig), short basic domain, secreted, (semaphorin) 3A	3.21009
ARL4C	10123	ADP-ribosylation factor-like 4C	3.11434
FZD7	8324	frizzled homolog 7 (Drosophila)	3.1113
ETV1	2115	ets variant 1	3.09176
SERPINA3	12	serpin peptidase inhibitor, clade A (alpha-1 antiproteinase, antitrypsin), member 3	3.05718
SPARC	6678	secreted protein, acidic, cysteine-rich (osteonectin)	3.00389
PLA2G7	7941	phospholipase A2, group VII (platelet-activating factor acetylhydrolase, plasma)	2.95928
ETV5	2119	ets variant 5	2.92941
ERRFI1	54206	ERBB receptor feedback inhibitor 1	2.8283
EYA1	2138	eyes absent homolog 1 (Drosophila)	2.81366
MIA	8190	melanoma inhibitory activity	2.80427
CDA	978	cytidine deaminase	2.79538
CALB2	794	calbindin 2	2.76985
EVI2B	2124	ecotropic viral integration site 2B	2.70528
SLFN11	91607	schlafen family member 11	2.67086
SERPINE2	5270	serpin peptidase inhibitor, clade E (nexin, plasminogen activator inhibitor type 1), member 2	2.65459
SOSTDC1	25928	sclerostin domain containing 1	2.52724
IL7R	3575	interleukin 7 receptor	2.51525
GUCY1A3	2982	guanylate cyclase 1, soluble, alpha 3	2.48757
KMO	8564	kynurenine 3-monooxygenase (kynurenine 3-hydroxylase)	2.45735
LRAT	9227	lecithin retinol acyltransferase (phosphatidylcholine--retinol O-acyltransferase)	2.45195
DPYSL3	1809	dihydropyrimidinase-like 3	2.44649
STS-1	84959	ubiquitin associated and SH3 domain containing, B	2.44176
7A5	346389	metastasis associated in colon cancer 1	2.44129
ETV4	2118	ets variant 4	2.42063
SRGN	5552	serglycin	2.39212
WWTR1	25937	WW domain containing transcription regulator 1	2.33971
PLAT	5327	plasminogen activator, tissue	2.30838
TNC	3371	tenascin C	2.30786
STAC	6769	SH3 and cysteine rich domain	2.30601
GABRA2	2555	gamma-aminobutyric acid (GABA) A receptor, alpha 2	2.26739
F3	2152	coagulation factor III (thromboplastin, tissue factor)	2.25331
FBXO17	115290	F-box protein 17	2.24689
VIM	7431	vimentin	2.24487
CLDN4	1364	claudin 4	2.18421
INPP4B	8821	inositol polyphosphate-4-phosphatase, type II, 105kDa	2.17439
ITGBL1	9358	integrin, beta-like 1 (with EGF-like repeat domains)	2.16941
FKBP10	60681	FK506 binding protein 10, 65 kDa	2.15841
PLEKHF1	79156	pleckstrin homology domain containing, family F (with FYVE domain) member 1	2.14716
KHDRBS3	10656	KH domain containing, RNA binding, signal transduction associated 3	2.145
KCNK2	3776	potassium channel, subfamily K, member 2	2.12254
LAMA4	3910	laminin, alpha 4	2.11646
SH3TC2	79628	SH3 domain and tetratricopeptide repeats 2	2.11206
KLK6	5653	kallikrein-related peptidase 6	2.11052
SLC20A1	6574	solute carrier family 20 (phosphate transporter), member 1	2.1102
PPAPDC1A	196051	phosphatidic acid phosphatase type 2 domain containing 1A	2.10661
GDF15	9518	growth differentiation factor 15	2.10485
STC2	8614	stanniocalcin 2	2.09052
SPRED1	161742	sprouty-related, EVH1 domain containing 1	2.0816
TFPI	7035	tissue factor pathway inhibitor (lipoprotein-associated coagulation inhibitor)	2.05403
SLC1A1	6505	solute carrier family 1 (neuronal/epithelial high affinity glutamate transporter, system Xag), member 1	2.03809
MAMDC2	256691	MAM domain containing 2	2.02583
THBS1	7057	thrombospondin 1	2.0027
ALDH3A1	218	aldehyde dehydrogenase 3 family, memberA1	-2.01983
SNF1LK	150094	salt-inducible kinase 1	-2.02407
BCL11B	64919	B-cell CLL/lymphoma 11B (zinc finger protein)	-2.02598
GPR1	2825	G protein-coupled receptor 1	-2.03119
RAPGEFL1	51195	Rap guanine nucleotide exchange factor (GEF)-like 1	-2.04281
DLL1	28514	delta-like 1 (Drosophila)	-2.05837
POSTN	10631	periostin, osteoblast specific factor	-2.07386
KLHL13	90293	kelch-like 13 (Drosophila)	-2.09437
NME5	8382	non-metastatic cells 5, protein expressed in (nucleoside-diphosphate kinase)	-2.09706
ATF7IP2	80063	activating transcription factor 7 interacting protein 2	-2.11628
SERPINE1	5054	serpin peptidase inhibitor, clade E (nexin, plasminogen activator inhibitor type 1), member 1	-2.13413
C10orf58	84293	chromosome 10 open reading frame 58	-2.13566
CYP4F3	4051	cytochrome P450, family 4, subfamily F, polypeptide 3	-2.13599
FBXO32	114907	F-box protein 32	-2.14149
CLU	1191	clusterin	-2.16
PXMP4	11264	peroxisomal membrane protein 4, 24kDa	-2.16187
FIBIN	387758	fin bud initiation factor homolog (zebrafish)	-2.19245
SELENBP1	8991	selenium binding protein 1	-2.21565
SEMA3F	6405	sema domain, immunoglobulin domain (Ig), short basic domain, secreted, (semaphorin) 3F	-2.2186
BCL2L11	10018	BCL2-like 11 (apoptosis facilitator)	-2.23307
IL1RN	3557	interleukin 1 receptor antagonist	-2.24023
CD24	934	CD24 molecule	-2.24494
IGFBP3	3486	insulin-like growth factor binding protein 3	-2.24892
TNFSF10	8743	tumor necrosis factor (ligand) superfamily, member 10	-2.2596
PROS1	5627	protein S (alpha)	-2.26004
SMARCA1	6594	SWI/SNF related, matrix associated, actin dependent regulator of chromatin, subfamily a, member 1	-2.34167
CYP4F11	57834	cytochrome P450, family 4, subfamily F, polypeptide 11	-2.34785
H19	283120	H19, imprinted maternally expressed transcript (non-protein coding)	-2.35545
EPSTI1	94240	epithelial stromal interaction 1 (breast)	-2.36448
JAM3	83700	junctional adhesion molecule 3	-2.37071
TAGLN	6876	transgelin	-2.41993
ELF3	1999	E74-like factor 3 (ets domain transcription factor, epithelial-specific )	-2.43423
ARSI	340075	arylsulfatase family, member I	-2.44495
ZNF185	7739	zinc finger protein 185 (LIM domain)	-2.44931
KRT14	3861	keratin 14	-2.51602
ZNF558	148156	zinc finger protein 558	-2.56358
LST-3TM12	338821	organic anion transporter LST-3b	-2.66375
ALDH1L2	160428	aldehyde dehydrogenase 1 family, member L2	-2.67143
DIO2	1734	deiodinase, iodothyronine, type II	-2.67732
LOC201229	201229	hypothetical protein LOC201229	-2.6782
MAFB	9935	v-maf musculoaponeurotic fibrosarcoma oncogene homolog B (avian)	-2.78335
DAPK1	1612	death-associated protein kinase 1	-2.84181
MSLN	10232	mesothelin	-2.87152
CCDC80	151887	coiled-coil domain containing 80	-2.91389
SLC47A2	146802	solute carrier family 47, member 2	-3.09263
KRT16	3868	keratin 16	-3.10234
KRT6A	3853	keratin 6A	-3.10303
OLR1	4973	oxidized low density lipoprotein (lectin-like) receptor 1	-3.14716
CD36	948	CD36 molecule (thrombospondin receptor)	-3.15273
BDKRB1	623	bradykinin receptor B1	-3.18027
SERPINB13	5275	serpin peptidase inhibitor, clade B (ovalbumin), member 13	-3.20405
TMTC1	83857	transmembrane and tetratricopeptide repeat containing 1	-3.21613
CYP1A1	1543	cytochrome P450, family 1, subfamily A, polypeptide 1	-3.49549
MAOA	4128	monoamine oxidase A	-3.6162
EMD	2010	emerin	-4.10987
LCP1	3936	lymphocyte cytosolic protein 1 (L-plastin)	-4.20845
SLCO1B3	28234	solute carrier organic anion transporter family, member 1B3	-4.24477
FLNA	2316	filamin A, alpha	-4.62661
AQP3	360	aquaporin 3 (Gill blood group)	-4.72269
