# Supplementary material for: Delineating Genetic Alterations for Tumor Progression in the MCF10A Series of Breast Cancer Cell Lines
Source: PLoS One. 2010 Feb 15;5(2):e9201. doi: 10.1371/journal.pone.0009201 (PMC2821407; doi:10.1371/journal.pone.0009201)
Supplement: Table S5 — Genes display 4-fold difference in expression levels between MCF10AT and MCF10CA1h. The values are log2(MCF10CA1h/MCF10AT). The genes included here have log2ratio >2 or log2ratio <−2. (0.05 MB XLS) [file pone.0009201.s008.xls]

## Sheet: Table_S2
Table S5. Genes display 4-fold difference in expression levels between MCF10AT and MCF10CA1h.
gene	gene_Id	description	log2ratio
PI15	51050	peptidase inhibitor 15	8.59053
CCND2	894	cyclin D2	5.24628
S100B	6285	S100 calcium binding protein B	5.14601
BST2	684	bone marrow stromal cell antigen 2	4.58608
IL17RD	54756	interleukin 17 receptor D	4.50448
PDE1C	5137	phosphodiesterase 1C, calmodulin-dependent 70kDa	4.33354
RHOJ	57381	ras homolog gene family, member J	4.02188
TREM2	54209	triggering receptor expressed on myeloid cells 2	3.95483
MLLT11	10962	myeloid/lymphoid or mixed-lineage leukemia (trithorax homolog, Drosophila); translocated to, 11	3.90398
ADAMTS9	56999	ADAM metallopeptidase with thrombospondin type 1 motif, 9	3.88514
NGFR	4804	nerve growth factor receptor (TNFR superfamily, member 16)	3.87935
GJA5	2702	gap junction protein, alpha 5, 40kDa	3.86745
H19	283120	H19, imprinted maternally expressed transcript (non-protein coding)	3.82593
LCN2	3934	lipocalin 2	3.79813
ITGB3	3690	integrin, beta 3 (platelet glycoprotein IIIa, antigen CD61)	3.72869
IGFBP2	3485	insulin-like growth factor binding protein 2, 36kDa	3.72704
PLCB1	23236	phospholipase C, beta 1 (phosphoinositide-specific)	3.66862
CDH11	1009	cadherin 11, type 2, OB-cadherin (osteoblast)	3.66719
RARRES1	5918	retinoic acid receptor responder (tazarotene induced) 1	3.65513
FBXO32	114907	F-box protein 32	3.64829
FREM2	341640	FRAS1 related extracellular matrix protein 2	3.60943
KRT23	25984	keratin 23 (histone deacetylase inducible)	3.51724
THY1	7070	Thy-1 cell surface antigen	3.47871
GALNT5	11227	UDP-N-acetyl-alpha-D-galactosamine:polypeptide N-acetylgalactosaminyltransferase 5 (GalNAc-T5)	3.46368
ZNF659	79750	zinc finger protein 385D	3.40891
GPX2	2877	glutathione peroxidase 2 (gastrointestinal)	3.38805
MGP	4256	matrix Gla protein	3.38245
KLHL13	90293	kelch-like 13 (Drosophila)	3.32829
BOC	91653	Boc homolog (mouse)	3.31609
PTPRZ1	5803	protein tyrosine phosphatase, receptor-type, Z polypeptide 1	3.30715
CXCL14	9547	chemokine (C-X-C motif) ligand 14	3.27713
CALB2	794	calbindin 2	3.27253
CFI	3426	complement factor I	3.25912
HAS2	3037	hyaluronan synthase 2	3.24081
GABRP	2568	gamma-aminobutyric acid (GABA) A receptor, pi	3.23974
SLC15A2	6565	solute carrier family 15 (H+/peptide transporter), member 2	3.21707
SULF1	23213	sulfatase 1	3.16834
CEACAM1	634	carcinoembryonic antigen-related cell adhesion molecule 1 (biliary glycoprotein)	3.15877
FBLN1	2192	fibulin 1	3.13053
NTRK2	4915	neurotrophic tyrosine kinase, receptor, type 2	3.12597
ODZ2	57451	odz, odd Oz/ten-m homolog 2 (Drosophila)	3.11147
GPR128	84873	G protein-coupled receptor 128	3.08881
PCDHB16	57717	protocadherin beta 16	3.07066
CA12	771	carbonic anhydrase XII	3.0651
SPARC	6678	secreted protein, acidic, cysteine-rich (osteonectin)	3.03088
ANKRD6	22881	ankyrin repeat domain 6	2.89057
APOBEC3G	60489	apolipoprotein B mRNA editing enzyme, catalytic polypeptide-like 3G	2.87901
VIT	5212	vitrin	2.87205
LINGO2	158038	leucine rich repeat and Ig domain containing 2	2.85484
IL1RAP	3556	interleukin 1 receptor accessory protein	2.82367
GPR64	10149	G protein-coupled receptor 64	2.8151
LRP1B	53353	low density lipoprotein-related protein 1B (deleted in tumors)	2.80617
CD74	972	CD74 molecule, major histocompatibility complex, class II invariant chain	2.80102
PCDHB9	56127	protocadherin beta 9	2.80056
PADI2	11240	peptidyl arginine deiminase, type II	2.79637
CHI3L1	1116	chitinase 3-like 1 (cartilage glycoprotein-39)	2.76583
SLC6A14	11254	solute carrier family 6 (amino acid transporter), member 14	2.73256
PLXDC2	84898	plexin domain containing 2	2.6549
PER3	8863	period homolog 3 (Drosophila)	2.64477
SLIT3	6586	slit homolog 3 (Drosophila)	2.62433
LPHN3	23284	latrophilin 3	2.61705
CP	1356	ceruloplasmin (ferroxidase)	2.60812
C3	718	complement component 3	2.60596
RRAGD	58528	Ras-related GTP binding D	2.57015
TMTC1	83857	transmembrane and tetratricopeptide repeat containing 1	2.56967
SYCP2	10388	synaptonemal complex protein 2	2.55829
NUAK1	9891	NUAK family, SNF1-like kinase, 1	2.54728
SLC47A1	55244	solute carrier family 47, member 1	2.53555
RASGRP1	10125	RAS guanyl releasing protein 1 (calcium and DAG-regulated)	2.5194
SESN3	143686	sestrin 3	2.51151
SEMA6A	57556	sema domain, transmembrane domain (TM), and cytoplasmic domain, (semaphorin) 6A	2.50967
PCDHB2	56133	protocadherin beta 2	2.47449
UNC5C	8633	unc-5 homolog C (C. elegans)	2.47386
FRMD3	257019	FERM domain containing 3	2.47174
ADAMTS3	9508	ADAM metallopeptidase with thrombospondin type 1 motif, 3	2.45675
MAMDC2	256691	MAM domain containing 2	2.44736
ZNF32	7580	zinc finger protein 32	2.41758
KLK5	25818	kallikrein-related peptidase 5	2.3903
CAPN6	827	calpain 6	2.38554
ISYNA1	51477	inositol-3-phosphate synthase 1	2.3674
ABCB11	8647	ATP-binding cassette, sub-family B (MDR/TAP), member 11	2.34409
AZGP1	563	alpha-2-glycoprotein 1, zinc-binding	2.32223
CX3CL1	6376	chemokine (C-X3-C motif) ligand 1	2.31631
ROPN1B	152015	ropporin, rhophilin associated protein 1B	2.3104
LOC93432	93432	maltase-glucoamylase-like pseudogene	2.30691
CRIP2	1397	cysteine-rich protein 2	2.2871
IGFBP4	3487	insulin-like growth factor binding protein 4	2.28436
GEM	2669	GTP binding protein overexpressed in skeletal muscle	2.28197
PCDHB4	56131	protocadherin beta 4	2.27622
SEMA3E	9723	sema domain, immunoglobulin domain (Ig), short basic domain, secreted, (semaphorin) 3E	2.26531
KIAA1622	57718	protein phosphatase 4, regulatory subunit 4	2.26395
CCDC129	223075	coiled-coil domain containing 129	2.25922
GPM6B	2824	glycoprotein M6B	2.25739
LOXL4	84171	lysyl oxidase-like 4	2.24166
PCDHB10	56126	protocadherin beta 10	2.24141
HS3ST3B1	9953	heparan sulfate (glucosamine) 3-O-sulfotransferase 3B1	2.21509
IFITM1	8519	interferon induced transmembrane protein 1 (9-27)	2.20643
MYLK	4638	myosin light chain kinase	2.19992
VTCN1	79679	V-set domain containing T cell activation inhibitor 1	2.19876
SERPINA3	12	serpin peptidase inhibitor, clade A (alpha-1 antiproteinase, antitrypsin), member 3	2.19393
SMARCA1	6594	SWI/SNF related, matrix associated, actin dependent regulator of chromatin, subfamily a, member 1	2.16422
EREG	2069	epiregulin	2.16338
SOSTDC1	25928	sclerostin domain containing 1	2.15957
KIAA1727	85462	FH2 domain containing 1	2.15676
PELI1	57162	pellino homolog 1 (Drosophila)	2.13418
PCDHB14	56122	protocadherin beta 14	2.12834
TRIB2	28951	tribbles homolog 2 (Drosophila)	2.11917
TPM1	7168	tropomyosin 1 (alpha)	2.11239
DEPDC6	64798	DEP domain containing 6	2.09509
FGFR2	2263	fibroblast growth factor receptor 2	2.09183
CRYAB	1410	crystallin, alpha B	2.08021
ST6GALNAC2	10610	ST6 (alpha-N-acetyl-neuraminyl-2,3-beta-galactosyl-1,3)-N-acetylgalactosaminide alpha-2,6-sialyltransferase 2	2.06225
MYEF2	50804	myelin expression factor 2	2.05312
TRPV4	59341	transient receptor potential cation channel, subfamily V, member 4	2.04829
SPRY2	10253	sprouty homolog 2 (Drosophila)	2.04447
BMP7	655	bone morphogenetic protein 7	2.0214
CAPG	822	capping protein (actin filament), gelsolin-like	-2.00666
BASP1	10409	brain abundant, membrane attached signal protein 1	-2.0113
ZNF680	340252	zinc finger protein 680	-2.01448
GPRC5A	9052	G protein-coupled receptor, family C, group 5, member A	-2.02065
SLC7A11	23657	solute carrier family 7, (cationic amino acid transporter, y+ system) member 11	-2.02997
DNAJB4	11080	DnaJ (Hsp40) homolog, subfamily B, member 4	-2.03546
KCNJ15	3772	potassium inwardly-rectifying channel, subfamily J, member 15	-2.03726
LPXN	9404	leupaxin	-2.03743
RAET1E	135250	retinoic acid early transcript 1E	-2.05246
ABCA12	26154	ATP-binding cassette, sub-family A (ABC1), member 12	-2.05423
COL6A3	1293	collagen, type VI, alpha 3	-2.05815
ADAMTS6	11174	ADAM metallopeptidase with thrombospondin type 1 motif, 6	-2.06541
AOX1	316	aldehyde oxidase 1	-2.08886
OR5M10	390167	olfactory receptor, family 5, subfamily M, member 10	-2.09626
DNER	92737	delta/notch-like EGF repeat containing	-2.10357
IL31RA	133396	interleukin 31 receptor A	-2.18807
SNORD116-8	100033420	small nucleolar RNA, C/D box 116-8	-2.21914
IFI44L	10964	interferon-induced protein 44-like	-2.22173
ABLIM3	22885	actin binding LIM protein family, member 3	-2.23969
FN1	2335	fibronectin 1	-2.31956
AFAP1L2	84632	actin filament associated protein 1-like 2	-2.34987
DKK1	22943	dickkopf homolog 1 (Xenopus laevis)	-2.36421
PGM2L1	283209	phosphoglucomutase 2-like 1	-2.42888
NT5E	4907	5'-nucleotidase, ecto (CD73)	-2.42889
SNORD116-3	100033415	small nucleolar RNA, C/D box 116-3	-2.44574
ARL14	80117	ADP-ribosylation factor-like 14	-2.4821
TMPRSS11E	28983	transmembrane protease, serine 11E	-2.49681
SRGN	5552	serglycin	-2.49819
PTGES	9536	prostaglandin E synthase	-2.51863
KRT81	3887	keratin 81	-2.53068
POSTN	10631	periostin, osteoblast specific factor	-2.5641
GABRA2	2555	gamma-aminobutyric acid (GABA) A receptor, alpha 2	-2.64162
GDA	9615	guanine deaminase	-2.65341
SNRPN	6638	small nuclear ribonucleoprotein polypeptide N	-2.78108
ABCG2	9429	ATP-binding cassette, sub-family G (WHITE), member 2	-2.78501
ANPEP	290	alanyl (membrane) aminopeptidase	-2.8146
SNORD116-24	100033435	small nucleolar RNA, C/D box 116-24	-2.83637
MMP13	4322	matrix metallopeptidase 13 (collagenase 3)	-2.88834
MCF2	4168	MCF.2 cell line derived transforming sequence	-3.0471
KYNU	8942	kynureninase (L-kynurenine hydrolase)	-3.09991
CDA	978	cytidine deaminase	-3.21112
EVI2B	2124	ecotropic viral integration site 2B	-3.27655
FLJ25801	205860	tripartite motif family-like 2	-3.38816
ABCC2	1244	ATP-binding cassette, sub-family C (CFTR/MRP), member 2	-3.42071
DCN	1634	decorin	-3.50921
EMP3	2014	epithelial membrane protein 3	-3.62393
KLHL4	56062	kelch-like 4 (Drosophila)	-4.14199
IL20RB	53833	interleukin 20 receptor beta	-4.22366
TGFBI	7045	transforming growth factor, beta-induced, 68kDa	-4.30878
PLAC8	51316	placenta-specific 8	-4.63267
PWCR1	63968	Prader-Willi syndrome chromosome region 1	-4.8529
SNORD116-15	100033427	small nucleolar RNA, C/D box 116-15	-4.98147
SNORD116-14	100033426	small nucleolar RNA, C/D box 116-14	-5.13861
SNORD116-17	100033429	small nucleolar RNA, C/D box 116-17	-5.61098
