# Supplementary material for: Delineating Genetic Alterations for Tumor Progression in the MCF10A Series of Breast Cancer Cell Lines
Source: PLoS One. 2010 Feb 15;5(2):e9201. doi: 10.1371/journal.pone.0009201 (PMC2821407; doi:10.1371/journal.pone.0009201)
Supplement: Table S7 — Genes display 4-fold difference in expression levels between MCF10CA1h and MCF10CA1a. The values are log2(MCF10CA1a/MCF10CA1h). The genes included here have log2ratio >2 or log2ratio <−2. (0.05 MB XLS) [file pone.0009201.s010.xls]

## Sheet: Table_S4
Table S7. Genes display 4-fold difference in expression levels between MCF10CA1h and MCF10CA1a.
gene	geneId	description	log2ratio
SNORD116-17	100033429	small nucleolar RNA, C/D box 116-17	5.96428
SNRPN// SNORD116-19	727708	small nucleolar RNA, C/D box 116-19	5.96428
SNORD116-14	100033426	small nucleolar RNA, C/D box 116-14	5.55104
SNORD116-15	100033427	small nucleolar RNA, C/D box 116-15	5.42084
PWCR1	63968	Prader-Willi syndrome chromosome region 1	4.95893
C3orf57	165679	chromosome 3 open reading frame 57	4.22162
SNORD116-24	100033435	small nucleolar RNA, C/D box 116-24	4.13201
AKR1B10	57016	aldo-keto reductase family 1, member B10 (aldose reductase)	4.11947
CEACAM6	4680	carcinoembryonic antigen-related cell adhesion molecule 6 (non-specific cross reacting antigen)	3.76711
CEACAM5	1048	carcinoembryonic antigen-related cell adhesion molecule 5	3.75665
FGFBP1	9982	fibroblast growth factor binding protein 1	3.4265
S100P	6286	S100 calcium binding protein P	3.36526
LIPK	643414	lipase, family member K	3.30847
AGR2	10551	anterior gradient homolog 2 (Xenopus laevis)	3.27956
SNORD116-3	100033415	small nucleolar RNA, C/D box 116-3	3.26638
GDF15	9518	growth differentiation factor 15	3.22024
MGC45491	221416	chromosome 6 open reading frame 223	3.19824
ABCC2	1244	ATP-binding cassette, sub-family C (CFTR/MRP), member 2	3.17481
SNRPN	6638	small nuclear ribonucleoprotein polypeptide N	3.12195
SNORD116-8	100033420	small nucleolar RNA, C/D box 116-8	3.10942
NAALADL2	254827	N-acetylated alpha-linked acidic dipeptidase-like 2	3.04544
MVD	4597	mevalonate (diphospho) decarboxylase	3.00627
TMPRSS4	56649	transmembrane protease, serine 4	2.97927
ACSS2	55902	acyl-CoA synthetase short-chain family member 2	2.97765
TMEM45A	55076	transmembrane protein 45A	2.96624
ZNF680	340252	zinc finger protein 680	2.94719
ACSL1	2180	acyl-CoA synthetase long-chain family member 1	2.90052
TCN1	6947	transcobalamin I (vitamin B12 binding protein, R binder family)	2.84219
GPRC5A	9052	G protein-coupled receptor, family C, group 5, member A	2.81291
SLC5A1	6523	solute carrier family 5 (sodium/glucose cotransporter), member 1	2.80947
ABCA12	26154	ATP-binding cassette, sub-family A (ABC1), member 12	2.80292
CASP14	23581	caspase 14, apoptosis-related cysteine peptidase	2.77497
TC2N	123036	tandem C2 domains, nuclear	2.77204
TM7SF2	7108	transmembrane 7 superfamily member 2	2.72113
TNFRSF11B	4982	tumor necrosis factor receptor superfamily, member 11b	2.69582
PSCA	8000	prostate stem cell antigen	2.69558
PRUNE2	158471	prune homolog 2 (Drosophila)	2.68684
IL8	3576	interleukin 8	2.54159
SNORD116-5	100033417	small nucleolar RNA, C/D box 116-5	2.53098
SNORD116-7	100033419	small nucleolar RNA, C/D box 116-7	2.53098
TMPRSS13	84000	transmembrane protease, serine 13	2.4943
SPRR1A	6698	small proline-rich protein 1A	2.4271
SC4MOL	6307	sterol-C4-methyl oxidase-like	2.42176
LSS	4047	lanosterol synthase (2,3-oxidosqualene-lanosterol cyclase)	2.39409
NPNT	255743	nephronectin	2.37754
DKK1	22943	dickkopf homolog 1 (Xenopus laevis)	2.35484
TSPAN15	23555	tetraspanin 15	2.32755
TSPAN1	10103	tetraspanin 1	2.30702
SPDEF	25803	SAM pointed domain containing ets transcription factor	2.30067
ARL14	80117	ADP-ribosylation factor-like 14	2.30066
SNORD116-6	100033418	small nucleolar RNA, C/D box 116-6	2.27961
PADI1	29943	peptidyl arginine deiminase, type I	2.25602
KYNU	8942	kynureninase (L-kynurenine hydrolase)	2.25061
HMGCS1	3157	3-hydroxy-3-methylglutaryl-Coenzyme A synthase 1 (soluble)	2.2504
PRSS8	5652	protease, serine, 8	2.24145
OR5M10	390167	olfactory receptor, family 5, subfamily M, member 10	2.23957
RHOF	54509	ras homolog gene family, member F (in filopodia)	2.22297
INSIG1	3638	insulin induced gene 1	2.20576
PECAM1	5175	platelet/endothelial cell adhesion molecule	2.20313
LIPH	200879	lipase, member H	2.19687
SLPI	6590	secretory leukocyte peptidase inhibitor	2.1957
KIAA1324	57535	KIAA1324	2.17871
POF1B	79983	premature ovarian failure, 1B	2.16974
SLC6A14	11254	solute carrier family 6 (amino acid transporter), member 14	2.16817
SCEL	8796	sciellin	2.14914
BSPRY	54836	B-box and SPRY domain containing	2.14503
SC5DL	6309	sterol-C5-desaturase (ERG3 delta-5-desaturase homolog, S. cerevisiae)-like	2.12961
CAPG	822	capping protein (actin filament), gelsolin-like	2.1025
ALDH3B2	222	aldehyde dehydrogenase 3 family, member B2	2.0924
ZNF91	7644	zinc finger protein 91	2.08237
HSD17B7P2	158160	hydroxysteroid (17-beta) dehydrogenase 7 pseudogene 2	2.06957
PAPPA	5069	pregnancy-associated plasma protein A, pappalysin 1	2.06915
ZNF558	148156	zinc finger protein 558	2.06776
TM4SF19	116211	transmembrane 4 L six family member 19	2.06588
STC1	6781	stanniocalcin 1	2.03581
MALL	7851	mal, T-cell differentiation protein-like	2.02385
TNFSF9	8744	tumor necrosis factor (ligand) superfamily, member 9	2.02254
LXN	56925	latexin	2.01706
CYP51A1	1595	cytochrome P450, family 51, subfamily A, polypeptide 1	2.0096
LRP1B	53353	low density lipoprotein-related protein 1B (deleted in tumors)	-2.00319
GHR	2690	growth hormone receptor	-2.01344
AADAT	51166	aminoadipate aminotransferase	-2.01904
SMARCA1	6594	SWI/SNF related, matrix associated, actin dependent regulator of chromatin, subfamily a, member 1	-2.03775
FN1	2335	fibronectin 1	-2.03874
CEP170	9859	centrosomal protein 170kDa	-2.07076
ADAMTS1	9510	ADAM metallopeptidase with thrombospondin type 1 motif, 1	-2.0724
ANXA6	309	annexin A6	-2.07358
TBX18	9096	T-box 18	-2.08054
MYLK	4638	myosin light chain kinase	-2.08107
SNAI2	6591	snail homolog 2 (Drosophila)	-2.11158
CDH2	1000	cadherin 2, type 1, N-cadherin (neuronal)	-2.11968
CX3CL1	6376	chemokine (C-X3-C motif) ligand 1	-2.12375
RNF150	57484	ring finger protein 150	-2.12803
TFCP2L1	29842	transcription factor CP2-like 1	-2.13781
SEMA6A	57556	sema domain, transmembrane domain (TM), and cytoplasmic domain, (semaphorin) 6A	-2.14184
PRR16	51334	proline rich 16	-2.15332
SLC2A9	56606	solute carrier family 2 (facilitated glucose transporter), member 9	-2.15773
COL4A1	1282	collagen, type IV, alpha 1	-2.16141
FRMD3	257019	FERM domain containing 3	-2.16771
NUAK1	9891	NUAK family, SNF1-like kinase, 1	-2.17474
CDH11	1009	cadherin 11, type 2, OB-cadherin (osteoblast)	-2.18056
CAPN6	827	calpain 6	-2.19839
KIAA1622	57718	protein phosphatase 4, regulatory subunit 4	-2.22132
BOC	91653	Boc homolog (mouse)	-2.22683
ROS1	6098	c-ros oncogene 1 , receptor tyrosine kinase	-2.23703
SLIT3	6586	slit homolog 3 (Drosophila)	-2.23963
ANKRD1	27063	ankyrin repeat domain 1 (cardiac muscle)	-2.28258
MPP1	4354	membrane protein, palmitoylated 1, 55kDa	-2.28893
MME	4311	membrane metallo-endopeptidase	-2.28999
EDIL3	10085	EGF-like repeats and discoidin I-like domains 3	-2.29142
FBXO32	114907	F-box protein 32	-2.29941
KIAA1727	85462	FH2 domain containing 1	-2.30752
SCNN1G	6340	sodium channel, nonvoltage-gated 1, gamma	-2.33335
CA12	771	carbonic anhydrase XII	-2.34065
ABCB11	8647	ATP-binding cassette, sub-family B (MDR/TAP), member 11	-2.36035
GPR64	10149	G protein-coupled receptor 64	-2.361
DOCK10	55619	dedicator of cytokinesis 10	-2.38692
AS3MT	57412	arsenic (+3 oxidation state) methyltransferase	-2.38782
PPARGC1A	10891	peroxisome proliferator-activated receptor gamma, coactivator 1 alpha	-2.4135
HIST1H1D	3007	histone cluster 1, H1d	-2.42303
SULT1E1	6783	sulfotransferase family 1E, estrogen-preferring, member 1	-2.43233
ADAMTS9	56999	ADAM metallopeptidase with thrombospondin type 1 motif, 9	-2.44209
GLT8D2	83468	glycosyltransferase 8 domain containing 2	-2.45769
CD74	972	CD74 molecule, major histocompatibility complex, class II invariant chain	-2.49277
SLC27A6	28965	solute carrier family 27 (fatty acid transporter), member 6	-2.49286
RHOJ	57381	ras homolog gene family, member J	-2.51929
PTPRZ1	5803	protein tyrosine phosphatase, receptor-type, Z polypeptide 1	-2.54818
NGFR	4804	nerve growth factor receptor (TNFR superfamily, member 16)	-2.5614
IFITM1	8519	interferon induced transmembrane protein 1 (9-27)	-2.57083
NRG4	145957	neuregulin 4	-2.60355
ZNF659	79750	zinc finger protein 385D	-2.60914
VIT	5212	vitrin	-2.63464
EFEMP1	2202	EGF-containing fibulin-like extracellular matrix protein 1	-2.69767
MT1E	4493	metallothionein 1E	-2.76266
LEPREL1	55214	leprecan-like 1	-2.77232
HMCN1	83872	hemicentin 1	-2.81098
MMP2	4313	matrix metallopeptidase 2 (gelatinase A, 72kDa gelatinase, 72kDa type IV collagenase)	-2.85129
FAP	2191	fibroblast activation protein, alpha	-2.88928
FAT2	2196	FAT tumor suppressor homolog 2 (Drosophila)	-2.91403
CFI	3426	complement factor I	-3.03111
ODZ2	57451	odz, odd Oz/ten-m homolog 2 (Drosophila)	-3.03733
MLLT11	10962	myeloid/lymphoid or mixed-lineage leukemia (trithorax homolog, Drosophila); translocated to, 11	-3.0621
THY1	7070	Thy-1 cell surface antigen	-3.13462
CFH	3075	complement factor H	-3.20109
GALNT5	11227	UDP-N-acetyl-alpha-D-galactosamine:polypeptide N-acetylgalactosaminyltransferase 5 (GalNAc-T5)	-3.21073
CXCL14	9547	chemokine (C-X-C motif) ligand 14	-3.25227
HS3ST3B1	9953	heparan sulfate (glucosamine) 3-O-sulfotransferase 3B1	-3.25355
TREM2	54209	triggering receptor expressed on myeloid cells 2	-3.38797
SULF1	23213	sulfatase 1	-3.3946
HIST1H3A	8350	histone cluster 1, H3a	-3.51101
GJA5	2702	gap junction protein, alpha 5, 40kDa	-3.62206
S100B	6285	S100 calcium binding protein B	-3.72194
H19	283120	H19, imprinted maternally expressed transcript (non-protein coding)	-3.95276
TIMP3	7078	TIMP metallopeptidase inhibitor 3	-4.06204
PI15	51050	peptidase inhibitor 15	-4.31468
HAS2	3037	hyaluronan synthase 2	-4.68423
HIST1H1B	3009	histone cluster 1, H1b	-4.96226
CCND2	894	cyclin D2	-5.15996
ACAT2	39	acetyl-Coenzyme A acetyltransferase 2	-5.22838
